# Supplementary material for: An OMV-Based Nanovaccine Confers Safety and Protection against Pathogenic Escherichia coli via Both Humoral and Predominantly Th1 Immune Responses in Poultry
Source: PubMed Central journal article supplement (PMC7699605; doi:10.3390/nano10112293), 2020-11-20
Supplement: nanomaterials-10-02293-s001.pdf [file nanomaterials-10-02293-s001.pdf]

Supplementary Materials

# An OMV-Based Nanovaccine Confers Safety and Protection against Pathogenic *Escherichia coli* via Both Humoral and Predominantly Th1 Immune Responses in Poultry

Rujiu Hu <sup>1</sup>, Haojing Liu <sup>1</sup>, Mimi Wang <sup>1</sup>, Jing Li <sup>2</sup>, Hua Lin <sup>1</sup>, Mingyue Liang <sup>1</sup>, Yupeng Gao <sup>1,\*</sup> and Mingming Yang <sup>1,\*</sup>

<sup>1</sup> College of Animal Science and Technology, Northwest A&F University, No.22 Xinong Road, Yangling 712100, Shaanxi, China; hurujiu@nwsuaf.edu.cn (R.H.); lhj1995@nwsuaf.edu.cn (H.L.); wmm@nwsuaf.edu.cn (M.W.); 17208046@nwsuaf.edu.cn (H.L.); lmy20@nwsuaf.edu.cn (M.L.)

<sup>2</sup> Department of Animal Engineering, Yangling Vocational and Technical College, No.24 Weihui Road, Yangling 712100, Shaanxi, China; lijing0916@nwafu.edu.cn

\* Correspondence: gaoyupeng@nwsuaf.edu.cn (Y.G.); ymm@nwsuaf.edu.cn (M.Y.)

**Table 1.** Primers used for quantitative real-time PCR in this study.

| Gene    | Acc. No.       | Primers Sequence (5'-3')                                | Reference                      |
|---------|----------------|---------------------------------------------------------|--------------------------------|
| β-actin | NM_205518      | F: ACACCCACACCCCTGTGATGAA<br>R: TGCTGCTGACACCTTCACCATTC | Li <i>et al.</i> , 2018 [1]    |
| TNF-α   | JN942589.1     | F: AGTGCTGTTCTATGACCGCC<br>R: CGCTCCTGACTCATAGCAGA      | Li <i>et al.</i> , 2018 [1]    |
| IL-4    | NM_001007079.1 | F: TCTTCCTCAACATGCGTCAG<br>R: TGGTGGGAAGAAGGTACGTAGG    | Li <i>et al.</i> , 2018 [1]    |
| IL-6    | NM_204628.1    | F: CTCCTCGCCAATCTGAAGTC<br>R: GGCCTGAAACTCCTGGTCT       | Li <i>et al.</i> , 2018 [1]    |
| IL-17A  | NM_204460.1    | F: ATGTCTCCGATCCCTTATTCT<br>R: CCTTTAAGCCTGGTGCTGGAT    | Min <i>et al.</i> , 2002 [2]   |
| IFN-γ   | NM_205149      | F: TGATGGCGTGAAGAAGGTG<br>R: GACTGGCTCCTTTTCCTTTTG      | Bolha <i>et al.</i> , 2013 [3] |
| MHC-IIβ | NM001318995    | F: CCCTCGGCGTTCTTCTTCTAC<br>R: CCCACGTCGCTGTGCGAA       | Lian <i>et al.</i> , 2010 [4]  |

1. Li R, Li J, Zhang S, Mi Y, Zhang. Attenuating effect of melatonin on lipopolysaccharide-induced chicken small intestine inflammation. *Poult. Sci.* **2018**, *97*, 2295–2302
2. Min WI, Lillehoj HS. Isolation and characterization of chicken interleukin-17 cDNA. *J. Interf. Cytok. Res.* **2002**, *22*, 1123–1128

3. Bolha L, Benčina D, Cizelj I, Oven I, Slavec B, Rojs OZ, Narat M. Effect of *Mycoplasma synoviae* and lentogenic Newcastle disease virus coinfection on cytokine and chemokine gene expression in chicken embryos. *Poult. Sci.* **2013**, *92*, 3134–3143
4. Lian L, Qu LJ, Zheng JX, Liu CJ, Zhang YP, Chen YM, Xu GY, Yang N. Expression profiles of genes within a subregion of chicken major histocompatibility complex B in spleen after Marek's disease virus infection. *Poult. Sci.* **2010**, *89*, 2123–2129
